# Supplementary material
Source: PubMed Central journal article supplement (PMC3647752)
Supplement: CVI.00593-12_zcd999094702so1.pdf [file CVI.00593-12_zcd999094702so1.pdf]

SUPPLEMENTARY FIGURE 1.

A

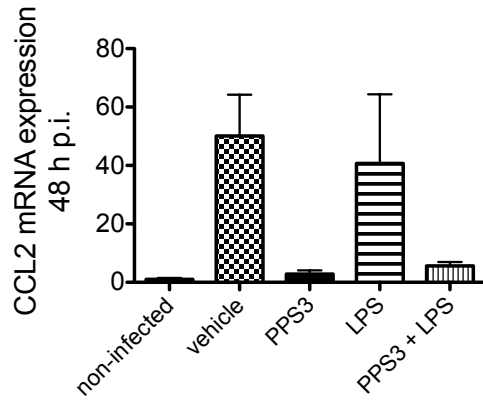

B

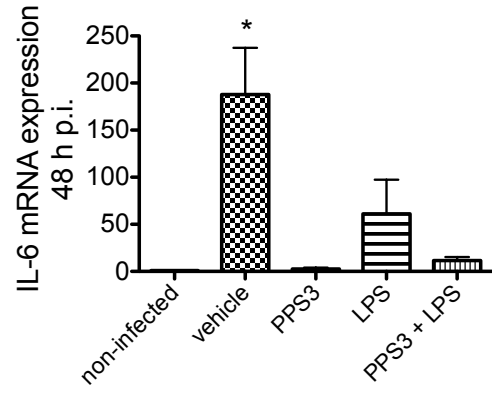

C

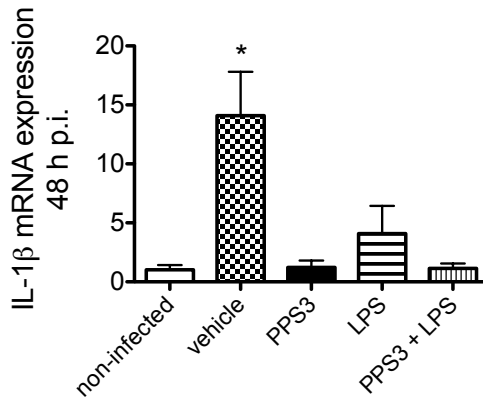

D

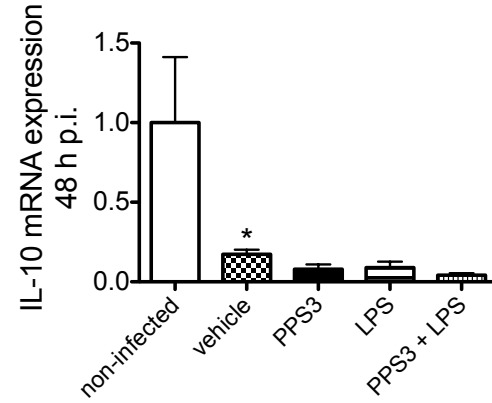

E

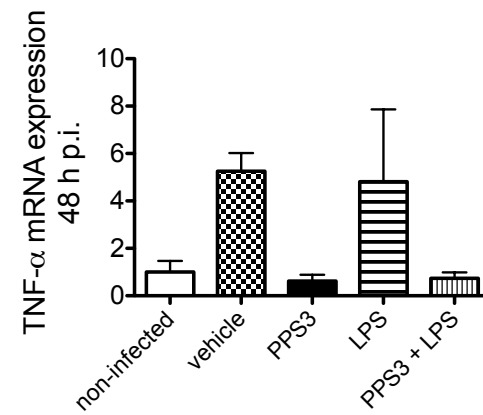

**SF 1.** Lung proinflammatory cytokine expression at 48 h p.i. in mice inoculated with a lower infectious dose ( $5 \times 10^3$  CFU) of *S. pneumoniae* ST 3. Mice ( $n = 4$  per group) were immunized with vehicle (PBS) or PPS3 + LPS 5 days prior to inoculation. Lung mRNA expression of (A) CCL2, (B) IL-6, (C) IL-1 $\beta$ , (D) IL-10, and (E) TNF- $\alpha$  was assessed by Q-PCR. Results were analyzed by  $\Delta\Delta$ CT method and expression levels are shown as fold change in comparison to baseline non-infected values ( $n = 5$ ). An asterisk denotes a  $P$ -value  $< 0.05$  as determined by one-way ANOVA with Tukey's post-hoc test in comparison to infected controls.
